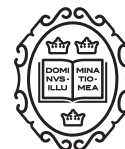

## Air Pollution and Heat Waves

# Long-term exposure to moderate fine particulate matter concentrations and cause-specific mortality in an ageing society

Youn-Hee Lim,<sup>1,2</sup> Jongmin Oh,<sup>3</sup> Changwoo Han,<sup>4</sup> Hyun-Joo Bae,<sup>5</sup> Soontae Kim,<sup>6</sup> Yoonyoung Jang,<sup>4</sup> Eunhee Ha<sup>3</sup> and Yun-Chul Hong<sup>1,2,4\*</sup>

<sup>1</sup>Section of Environmental Health, Department of Public Health, University of Copenhagen, Copenhagen, Denmark, <sup>2</sup>Institute of Environmental Medicine, Seoul National University Medical Research Center, Seoul, Republic of Korea, <sup>3</sup>Department of Occupational and Environmental Medicine, School of Medicine, Ewha Womans University, Seoul, Republic of Korea, <sup>4</sup>Department of Preventive Medicine, Seoul National University College of Medicine, Seoul, Republic of Korea, <sup>5</sup>Korea Environment Institute, Sejong, Republic of Korea and <sup>6</sup>Department of Environmental and Safety Engineering, Ajou University, Suwon, Republic of Korea

\*Corresponding author. Institute of Environmental Medicine, Seoul National University Medical Research Center, 103 Daehakro, Jongno-Gu, Seoul 110-799, Republic of Korea. E-mail: ychong1@snu.ac.kr

Editorial decision 14 July 2020; Accepted 28 July 2020

## Abstract

**Background:** Long-term exposure to particulate matter  $<2.5 \mu\text{m}$  in size ( $\text{PM}_{2.5}$ ) is considered a risk factor for premature death. However, only a few studies have been conducted in areas with moderate  $\text{PM}_{2.5}$  concentrations. Moreover, an ageing society may be more susceptible to environmental exposure and future burden of mortality due to  $\text{PM}_{2.5}$ .

**Methods:** This study estimates hazard ratios (HRs) for all-cause and cause-specific mortality from long-term exposure to moderate  $\text{PM}_{2.5}$  concentrations in the elderly populations of seven cities in South Korea. We also projected nationwide elderly mortality caused by long-term exposure to  $\text{PM}_{2.5}$ , accounting for population ageing until 2045. Mortality in 1 720 230 elderly adults aged  $\geq 65$  years in 2008 was monitored across 2009–16 and linked to modelled  $\text{PM}_{2.5}$  concentrations.

**Results:** A total of 421 100 deaths occurred in 2009–16, and the mean of annual  $\text{PM}_{2.5}$  concentration ranged between 21.1 and  $31.9 \mu\text{g}/\text{m}^3$  in most regions. The overall HR for a  $10 \mu\text{g}/\text{m}^3$  increase in a 36-month  $\text{PM}_{2.5}$  moving average was 1.024 (95% confidence intervals: 1.009, 1.039). We estimated that 11 833 all-cause nationwide elderly deaths were attributable to  $\text{PM}_{2.5}$  exposure. Annual death tolls may increase to 17 948 by 2045. However, if  $\text{PM}_{2.5}$  is reduced to  $5 \mu\text{g}/\text{m}^3$  by 2045, the tolls may show a lower increase to 3646.

**Conclusions:** Long-term exposure to moderately high levels of  $\text{PM}_{2.5}$  was associated with increased mortality risk among the elderly. Thus,  $\text{PM}_{2.5}$  reduction in response to the projected ageing-associated mortality in South Korea is critical.

**Key words:** Ageing society, burden of mortality, particulate matter, survival analyses

### Key Messages

- Globally, particulate matter  $<2.5 \mu\text{m}$  in size ( $\text{PM}_{2.5}$ ) caused  $\sim 2.2$  million deaths in the elderly population in 2015. If the current  $\text{PM}_{2.5}$  concentration level remains, and the elderly population increases in the future, the population may face more significant negative health impacts.
- We estimated that 11 833 all-cause nationwide elderly deaths were attributable to  $\text{PM}_{2.5}$  exposure in 2015. Annual death tolls may increase to 17 948 by 2045. However, if  $\text{PM}_{2.5}$  is reduced to  $5 \mu\text{g}/\text{m}^3$  by 2045, the tolls may decrease to 3646.
- The projection of mortality attributable to long-term exposure to  $\text{PM}_{2.5}$  indicated the urgent need for emission control and reduction in  $\text{PM}_{2.5}$  concentration levels in South Korea over the coming decades to safeguard the vulnerable ageing population.

## Introduction

Long-term exposure to particulate matter  $<2.5 \mu\text{m}$  in size ( $\text{PM}_{2.5}$ ) has been suggested as a risk factor for premature death due to ischaemic heart disease (IHD), stroke, chronic obstructive pulmonary disease (COPD), lung cancer and lower respiratory tract infections. Globally,  $\text{PM}_{2.5}$  caused  $\sim 4.2$  million premature deaths in all age groups and 2.2 million deaths in the elderly population in 2015.<sup>1</sup> If the current  $\text{PM}_{2.5}$  concentration level is maintained and the elderly population increases in the future, the population may face more significant negative health impacts.

Several concentration–response (CR) functions integrating long-term  $\text{PM}_{2.5}$  exposure and mortality have been used to estimate  $\text{PM}_{2.5}$ -associated deaths. Currently, integrated exposure–response (IER) functions developed based on cohort studies are widely used.<sup>1</sup> However, IER functions are limited due to their reliance on cohort studies from Western countries where  $\text{PM}_{2.5}$  concentrations are relatively low compared with other regions. Recent cohort studies in Asia<sup>2,3</sup> have led to a reduction in CR function uncertainties at higher  $\text{PM}_{2.5}$  concentration ranges. However, significant uncertainties still remain regarding the shape of the CR functions in mid-range exposure ( $20\text{--}40 \mu\text{g}/\text{m}^3$ ). Estimating the health effects of  $\text{PM}_{2.5}$  in South Korea may help to fill the knowledge gap regarding the long-term health effects of mid-range  $\text{PM}_{2.5}$  exposure. Moreover, previous  $\text{PM}_{2.5}$  health impact studies in South Korea have been conducted by applying the IER functions, or the previously reported linear CR functions.<sup>4,5</sup> However, no studies have calculated the burden of mortality due to  $\text{PM}_{2.5}$  using locally estimated CR functions.

Elderly adults do not respond well to external environmental stresses and thus are most susceptible to the adverse effects of  $\text{PM}_{2.5}$  exposure.<sup>6</sup> After exposure to air pollution,

inflammatory and autonomic responses have been shown to be weak in elderly adults, due to a decline in physiological functions, resulting in increased comorbidity from diseases associated with air pollution.<sup>7,8</sup> Given that approximately half of Korean elderly adults have at least one chronic disease, such as hypertension, diabetes mellitus or dyslipidaemia,<sup>9</sup> the elderly may be more susceptible to the adverse health effects associated with air pollution.<sup>10</sup>

The Korean Statistical Information System (KOSIS) has estimated that the elderly population will triple by 2045 (i.e.  $\sim 17.2$  million) compared with 2015 (i.e.  $\sim 6.6$  million) in 16 regions of South Korea.<sup>11</sup> Therefore, an estimation of  $\text{PM}_{2.5}$  health effects on elderly adults as well as the burden of mortality due to  $\text{PM}_{2.5}$ , not only accounting for the current elderly population but also the growth in the ageing population over the next few decades, may provide evidence to gauge the degree of required emission control and enable policymakers and stakeholders to develop preventive strategies regarding air pollution.

Therefore, health insurance claims data from South Korea were used herein to estimate hazard ratios (HRs) of long-term  $\text{PM}_{2.5}$  exposure in all-cause and cause-specific elderly mortality from 2009 to 2016. Using the estimated HRs, we projected the nationwide elderly mortality attributable to long-term  $\text{PM}_{2.5}$  exposure from 2020 to 2045.

## Methods

### Study population

This study was conducted in two stages: estimation of HRs and burden of mortality due to  $\text{PM}_{2.5}$ . Two study populations are described separately according to the research aims.

## Study population for long-term PM<sub>2.5</sub> exposure HR estimation

The study population was comprised of residents from seven major cities in South Korea, aged  $\geq 65$  years in 2008, and registered as insurance policyholders or dependents in the National Health Information Database (NHID). The NHID covers >50 million (97%) Korean citizens; more detailed information on the NHID can be found in previous work.<sup>12</sup> Due to the limited data access to the NHID for external researchers, seven cities were included in this study: Seoul (25 districts), Busan (16 districts), Daegu (8 districts), Incheon (10 districts), Gwangju (5 districts), Daejeon (5 districts) and Ulsan (5 districts). Out of 1 874 159 elderly adults in the seven cities aged  $\geq 65$  years in 2008, 153 929 were excluded from this study due to missing covariate data (sex, age, or income- and wealth-based insurance premiums). Therefore, data from a total of 1 720 230 elderly individuals were included in our HR estimation analysis. Death certificates collected by Statistics Korea were linked to the eligible individuals, including the date and cause of death. Statistics Korea linked the data internally using a unique 13-digit personal identification number and provided the death data to the NHID with a decoded identification of individuals.

Cause-specific mortality was determined based on the 10th revision of the International Classification of Diseases (ICD-10) between 2009 and 2016. In addition to all-cause mortality, cardiovascular mortality (ICD-10, I00–I99), respiratory (ICD-10, J00–J99), cancer (C00–C99), IHD (I20–I25), stroke (I60–I69), haemorrhagic stroke (I60–I62), ischaemic stroke (I63–I66), COPD (J40–J44), asthma (J45–J46) and lung cancer (C33–C34) were identified when the underlying cause of death had been recorded.

The individuals were monitored from 1 January 1 2009 until either the date of death or the end of the study (31 December 2016).

## Study population for the burden of mortality due to PM<sub>2.5</sub>

To calculate the burden of mortality due to long-term exposure to PM<sub>2.5</sub>, the elderly population and mortality data were collected from the KOSIS<sup>11</sup> (Supplementary Text S1, Tables S1 and S2, and Figure S1, available as Supplementary data at *IJE* online). In addition to the seven cities (Seoul, Busan, Daegu, Incheon, Gwangju, Daejeon and Ulsan) used to estimate the long-term PM<sub>2.5</sub> exposure HRs, additional nine provinces were also considered (Kyunggi, Kwangwon, Choongbuk, Choongnam, Jeonbuk, Jeonnam, Kyungbuk, Kyungnam and Jeju) to estimate nationwide health impacts on the elderly. Residents in seven

cities and nine provinces were exclusively included in the study (i.e. those living in one of the seven cities are not resident in any of the provinces).

This study was exempted for review by the Institutional Review Board of the Seoul National University Hospital (E-1807-038-956) because the identification of individuals was decoded by the NHID and the KOSIS before the authors had access to the datasets.

## Exposure assessment

Three different PM<sub>2.5</sub> concentration moving average values (12-, 24- and 36-month) were computed by averaging daily PM<sub>2.5</sub> concentrations of the concurrent month and the 11, 23 and 35 previous months of exposure, respectively, for each district. District-level 12-, 24- and 36-month moving average PM<sub>2.5</sub> concentrations in monthly time intervals were assigned to the individuals based on the residential address in the NHID during the follow-up. Description of the exposure modelling can be found in previous studies,<sup>13,14</sup> and is summarized in Supplementary Text S2, available as Supplementary data at *IJE* online. We obtained daily meteorological data from the Korea Meteorological Administration and computed annual average temperatures in summer (i.e. June–August) and winter (i.e. December–February) for each district.

## Individual- and district-level covariates

We garnered individual- (sex, age and annual income- and wealth-based insurance premiums) and district-level variables [current smoking rate (%), monthly average income (KRW), the proportion of the population with a high-school diploma (%) and the population-standardized elderly mortality rate per 100 000 people]. Age and sex (male or female) data were obtained from the NHID. Data on age and insurance premiums were obtained at the end of each year and therefore generated for individuals in annual time intervals. Description of the covariates is detailed in the Supplementary Text 3, available as Supplementary data at *IJE* online.

## Statistical analysis

Time-varying Cox proportional hazards models were used to estimate HRs for all-cause and cause-specific mortality associated with PM<sub>2.5</sub> levels. The individuals were monitored from the baseline (1 January 2009) to the date of death or 31 December 2016 (i.e. whichever was earlier). Moving average PM<sub>2.5</sub> concentration (12-, 24- and 36-month) levels were assigned to individuals in monthly time intervals, and age, insurance premiums and temperatures

were assigned in annual time intervals. Sex and district-level covariates were considered to be time-invariant in the model. We estimated linear HRs of the association between the long-term exposure to PM<sub>2.5</sub> and cause-specific mortality. In the base model, we adjusted for each individual's sex, age, annual income- and wealth-based insurance premiums (low or high), region (one of seven cities) and annual average summer and winter temperatures. In the full model, we additionally considered district-level covariates, including current smoking rate (%), monthly average income (KRW), the proportion of the population with a high-school diploma (%) and population-standardized elderly mortality rate per 100 000 people. We also compared the HRs for the mortality associated with the 36-month moving average PM<sub>2.5</sub> by sex. In a sensitivity analysis, we applied a random intercept to account for the correlation between districts within cities.

The burden of all-cause mortality due to long-term exposure to PM<sub>2.5</sub> in 16 regions in South Korea was estimated based on four PM<sub>2.5</sub> concentration scenarios, annual elderly population and mortality rates between 2015 and 2045 with an assumption of linearity of PM<sub>2.5</sub>-associated health effects. Scenario 1 considered the same PM<sub>2.5</sub> exposure levels as those in 2015, which assumes that PM<sub>2.5</sub> levels and HRs will remain the same in 2015–45. Scenarios 2, 3 and 4 accounted for linear reductions of PM<sub>2.5</sub> levels by 2045 to 15, 10 and 5 µg/m<sup>3</sup>, respectively.

Considering the HRs of PM<sub>2.5</sub>, a growing ageing population, and the four scenarios for PM<sub>2.5</sub> levels, the burden of mortality due to long-term exposure to PM<sub>2.5</sub> was computed for 2015, 2020, 2025, 2030, 2035, 2040 and 2045 in South Korea (seven cities and nine provinces), as follows:

$$\Delta M_i = P_i \times I_i \times \left( \frac{HR - 1}{HR} \right) \times \Delta PM$$

where  $\Delta M_i$  is the mortality burden due to long-term exposure to PM<sub>2.5</sub> for each region  $i$ ,  $P_i$  is the population aged  $\geq 65$  years in each region ( $i$ ),  $I_i$  is the average annual mortality rate in the population aged  $\geq 65$  years in each region ( $i$ ),  $\Delta PM$  is the concentration of PM<sub>2.5</sub> levels, and  $HR$  represents the all-cause or cause-specific HRs for the elderly.

All analyses were conducted using SAS (v 9.4; Cary, NC, USA) and the R software for statistical computing (v 3.6.0).

## Results

In the enrolment year (2008), data on 1 720 230 elderly adults ( $\geq 65$  years old) residing in seven cities were analysed in the study. During the follow-up period (2009–16),

a total of 421 100 elderly subjects died. Of the deceased, 29.6% ( $n = 124 650$ ) died due to cancer, followed by cardiovascular-related diseases (29.6%,  $n = 124 491$ ) and respiratory diseases (13.0%,  $n = 54 658$ ). Cause-specific mortality counts due to IHD, stroke, COPD, asthma and lung cancer were 29 458 (7.0%), 53 929 (12.8%), 11 384 (2.7%), 3168 (0.8%) and 32 009 (7.6%), respectively (Table 1). Cancer (including lung cancer) mortality occurred at relatively younger ages, whereas older adults died due to cardiovascular and respiratory diseases (Supplementary Figure S2, available as Supplementary data at *IJE* online). In particular, 39.6 and 35.8% of individuals aged between 65 and 74 years died due to cardiovascular and respiratory diseases, whereas 61.6% died due to cancer (Supplementary Table S3, available as Supplementary data at *IJE* online). The proportions of the population with a high-school diploma and men who were current smokers were  $>60$  and 40% in the seven cities, respectively (Supplementary Text 1, Table S4, available as Supplementary data at *IJE* online).

PM<sub>2.5</sub> concentration levels decreased until 2012 and peaked in 2014 (for Seoul only) or 2013 (for other areas) (Supplementary Figure S3, available as Supplementary data at *IJE* online). Mean annual PM<sub>2.5</sub> concentrations in 2006–16 ranged between 21.1 (Kyungbuk) and 31.9 µg/m<sup>3</sup> (Seoul), except in Jeju island (11.3 µg/m<sup>3</sup>) (Table 2 and Supplementary Figure S4, available as Supplementary data at *IJE* online). The median level of the mean PM<sub>2.5</sub> concentration in the seven cities was 27.4 µg/m<sup>3</sup>.

A plot of the relationship between all-cause elderly mortality and PM<sub>2.5</sub> is illustrated in Figure 1. Our results showed non-linear relationships between all-cause, IHD and lung cancer mortality, whereas asthma and COPD mortality showed linear relationships with PM<sub>2.5</sub>. Risks of IHD, COPD and asthma mortality attributable to long-term exposure to PM<sub>2.5</sub> levels were higher than those of stroke and lung cancer mortality (Supplementary Figure S5, available as Supplementary data at *IJE* online).

HRs for the links between PM<sub>2.5</sub> and all-cause mortality showed strong associations when the elderly were exposed to PM<sub>2.5</sub> levels equivalent to the 36-month moving average: 1.030 [with 95% confidence interval (CI) values of 1.014, 1.045] per 10 µg/m<sup>3</sup> increase in PM<sub>2.5</sub> in the base model. After controlling for district-level covariates in the full model, the HR was slightly attenuated to 1.024 (95% CI: 1.009, 1.039). Furthermore, random intercept models did not alter our main findings (data not shown). Cardiovascular-related and IHD mortality also showed positive associations with increases in the 36-month moving average PM<sub>2.5</sub>: 1.090 (95% CI: 1.060, 1.121) and 1.306 (95% CI: 1.233, 1.383), respectively, in the full model (Table 3). The HR of the female mortality due to

**Table 1.** Characteristics of numbers of deaths among National Health Insurance policyholders  $\geq 65$  years old in 2008 residing in seven cities in South Korea ( $n = 1\,720\,230$ )

| Characteristic             | ICD-10 Code | No. of deaths and cause of death (%) | No. (%) of subpopulation among total deaths |                |                | Time (months, mean $\pm$ SD) |
|----------------------------|-------------|--------------------------------------|---------------------------------------------|----------------|----------------|------------------------------|
|                            |             |                                      | Female                                      | 75+ years old  | Low income     |                              |
| Baseline participants      |             |                                      | 987 137                                     | 465 199        | 930 396        |                              |
| All-cause deaths           | A00–Y99     | 421 100 (100.0)                      | 214 946 (51.0)                              | 238,966 (56.7) | 228 560 (54.3) | 57.6 $\pm$ 30.5              |
| All cardiovascular disease | I00–I99     | 124 491 (29.6)                       | 71 803 (57.7)                               | 75 151 (60.4)  | 68 521 (55.0)  | 61.3 $\pm$ 33.4              |
| Ischaemic heart disease    | I20–I25     | 29 458 (7.0)                         | 15 908 (54.0)                               | 17 193 (58.4)  | 16 425 (55.8)  | 60.6 $\pm$ 33.3              |
| Stroke                     | I60–I69     | 53 929 (12.8)                        | 29 684 (55.0)                               | 31 092 (57.7)  | 29 517 (54.7)  | 58.1 $\pm$ 33.3              |
| Haemorrhagic stroke        | I60–I62     | 11 940 (2.8)                         | 5895 (49.4)                                 | 6971 (58.4)    | 6560 (54.9)    | 58.5 $\pm$ 34.0              |
| Ischaemic stroke           | I63–I66     | 23 200 (5.5)                         | 14 505 (62.5)                               | 12 532 (54.0)  | 12 970 (55.9)  | 57.5 $\pm$ 33.4              |
| All respiratory disease    | J00–J99     | 54 658 (13.0)                        | 24 501 (44.8)                               | 35 117 (64.2)  | 28 858 (52.8)  | 68.2 $\pm$ 32.5              |
| COPD                       | J40–J44     | 11 384 (2.7)                         | 3479 (30.6)                                 | 7107 (62.4)    | 6168 (54.2)    | 60.0 $\pm$ 33.3              |
| Asthma                     | J45–J46     | 3168 (0.8)                           | 1944 (61.4)                                 | 2317 (73.1)    | 1812 (57.2)    | 55.6 $\pm$ 33.8              |
| All cancer                 | C00–C99     | 124 650 (29.6)                       | 48 044 (38.5)                               | 47 819 (38.4)  | 67 477 (54.1)  | 61.1 $\pm$ 33.0              |
| Lung cancer                | C33–C34     | 32 009 (7.6)                         | 8677 (27.1)                                 | 11 174 (34.9)  | 17 899 (55.9)  | 60.4 $\pm$ 33.2              |

**Table 2.** Descriptive statistics of PM<sub>2.5</sub> concentrations during the 2006–16 period

| City/province | Surface area (km <sup>2</sup> ) | PM <sub>2.5</sub> concentration |      |      |      |      |
|---------------|---------------------------------|---------------------------------|------|------|------|------|
|               |                                 | Mean                            | SD   | 25%  | 50%  | 75%  |
| City          |                                 |                                 |      |      |      |      |
| Seoul         | 605                             | 31.9                            | 20.2 | 19.4 | 28.0 | 39.2 |
| Busan         | 770                             | 26.1                            | 14.8 | 17.2 | 23.1 | 31.8 |
| Daegu         | 884                             | 27.4                            | 16.7 | 17.2 | 24.2 | 33.9 |
| Incheon       | 1049                            | 30.3                            | 18.1 | 18.9 | 26.7 | 37.4 |
| Gwangju       | 501                             | 26.2                            | 16.7 | 15.6 | 22.9 | 32.6 |
| Daejeon       | 539                             | 29.3                            | 19.3 | 16.7 | 25.6 | 36.9 |
| Ulsan         | 1061                            | 26.0                            | 16.8 | 15.8 | 22.7 | 32.5 |
| Province      |                                 |                                 |      |      |      |      |
| Kyunggi       | 10 175                          | 30.1                            | 17.6 | 19.0 | 27.0 | 37.0 |
| Kwangwon      | 16 826                          | 22.6                            | 12.9 | 13.7 | 20.2 | 28.4 |
| Choongbuk     | 7407                            | 30.1                            | 17.9 | 18.1 | 26.7 | 38.1 |
| Choongnam     | 8214                            | 28.0                            | 16.8 | 17.6 | 25.1 | 34.4 |
| Jeonbuk       | 8067                            | 28.5                            | 16.4 | 17.7 | 25.4 | 35.3 |
| Jeonnam       | 12 313                          | 21.8                            | 12.6 | 13.7 | 19.2 | 26.4 |
| Kyungbuk      | 19 031                          | 21.1                            | 13.3 | 13.0 | 18.9 | 26.7 |
| Kyungnam      | 10 539                          | 24.4                            | 13.9 | 16.0 | 21.8 | 29.5 |
| Jeju          | 1849                            | 11.3                            | 9.4  | 5.7  | 9.1  | 14.1 |

IHD was greater than that of the male mortality: 1.163 (95% CI: 1.066, 1.270) for male and 1.302 (95% CI: 1.201, 1.413) for female mortality per 10  $\mu\text{g}/\text{m}^3$  increase in the 36-month moving average PM<sub>2.5</sub> (Supplementary Figure S6, available as Supplementary data at *IJE* online).

Shorter PM<sub>2.5</sub> exposure windows (12- and 24-month moving average) were associated with an increased risk of cardiovascular-related and IHD mortality. However, the effect sizes were attenuated compared with the longer exposure window (36-month) (Supplementary Table S5, available as Supplementary data at *IJE* online). Specific causes of respiratory and cancer mortality also showed strong associations with PM<sub>2.5</sub>. HRs of COPD, asthma and lung cancer mortality were respectively 1.097 (95% CI: 1.001, 1.202), 1.230 (95% CI: 1.038, 1.458) and 1.069 (95% CI: 1.012, 1.129) per 10  $\mu\text{g}/\text{m}^3$  increase in PM<sub>2.5</sub> concentration in the full model (Table 3). The associations of COPD with the 36-month moving average PM<sub>2.5</sub> were more pronounced in the case of female mortality than in the case of male mortality. However, shorter PM<sub>2.5</sub> exposure windows were not associated with COPD (12- and 24-month moving averages) and lung cancer (12-month moving average).

We estimated that 11 833 all-cause deaths of the elderly were attributable to long-term exposure to PM<sub>2.5</sub> in 2015. Among these attributable deaths, 6820, 2143 and 1191 deaths were due to IHD, lung cancer and COPD, respectively. Moreover, 4693 all-cause deaths occurred in the seven cities, whereas 7139 deaths occurred across the nine provinces (Table 4). Given the predicted increase in the elderly population and decrease in mortality rate over the coming years (Supplementary Table S1; Figure S1, available as Supplementary data at *IJE* online), projected



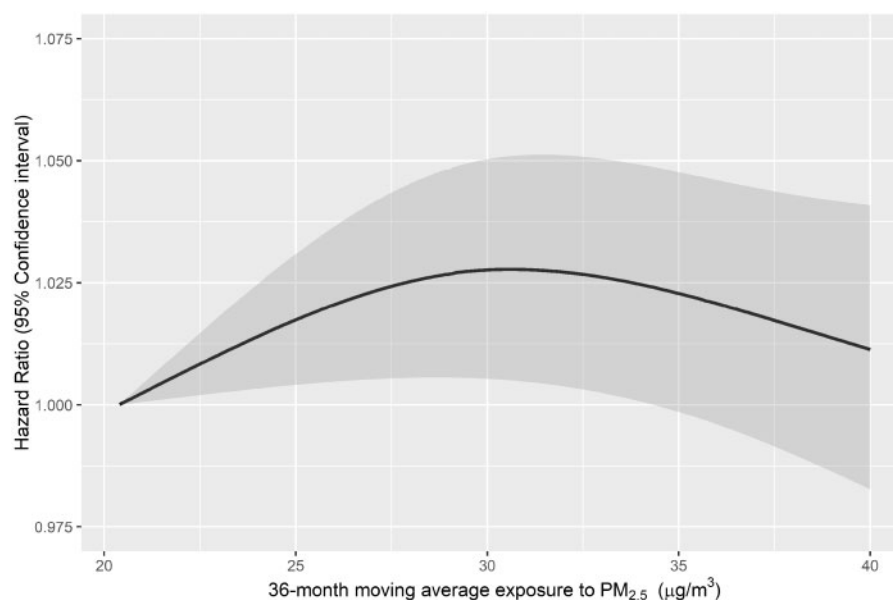

**Figure 1.** Hazard ratio plot for all-cause mortality. Models controlled for age, sex, average annual summer and winter temperature in the year before death, individual income- and wealth-based monthly insurance premiums (low or high), region (seven cities), district-level current smoking rate (%), monthly average income (KRW), proportion of population with a high-school diploma (%) and population-standardized elderly mortality rate per 100 000 people

**Table 3.** Hazard ratio for all-cause and cause-specific mortality associated with 10  $\mu\text{g}/\text{m}^3$  increases in 36-month moving average exposure to  $\text{PM}_{2.5}$  in seven cities in South Korea, 2008–16 (95% confidence intervals in parenthesis)

|                            | Base model <sup>a</sup> |         | Full model <sup>b</sup> |         |
|----------------------------|-------------------------|---------|-------------------------|---------|
| All-cause deaths           | 1.030 (1.014, 1.045)*   | 0.0002  | 1.024 (1.009, 1.039)*   | 0.002   |
| All cardiovascular disease | 1.067 (1.038, 1.097)*   | <0.0001 | 1.090 (1.060, 1.121)*   | <0.0001 |
| Ischaemic heart disease    | 1.251 (1.181, 1.325)*   | <0.0001 | 1.306 (1.233, 1.383)*   | <0.0001 |
| Stroke                     | 1.026 (0.980, 1.075)    | 0.224   | 1.016 (0.973, 1.061)    | 0.4655  |
| Haemorrhagic stroke        | 0.965 (0.878, 1.060)    | 0.4562  | 0.951 (0.863, 1.049)    | 0.3173  |
| Ischaemic stroke           | 0.995 (0.933, 1.062)    | 0.8868  | 1.000 (0.934, 1.071)    | 0.9941  |
| All respiratory disease    | 0.968 (0.927, 1.011)    | 0.1444  | 0.974 (0.933, 1.018)    | 0.2425  |
| COPD                       | 1.166 (1.060, 1.282)*   | <0.0001 | 1.097 (1.001, 1.202)*   | 0.0481  |
| Asthma                     | 1.243 (1.044, 1.480)*   | 0.0147  | 1.230 (1.038, 1.458)*   | 0.0168  |
| All cancer                 | 1.024 (0.996, 1.053)    | 0.095   | 1.028 (1.000, 1.058)    | 0.0539  |
| Lung cancer                | 1.038 (0.982, 1.097)    | 0.1858  | 1.069 (1.012, 1.129)*   | 0.0162  |

\*P-value < 0.05 for testing a null hypothesis that a hazard ratio equals to one with an increase in  $\text{PM}_{2.5}$  concentration.

<sup>a</sup>Base models controlled for age, sex, average annual summer and winter temperature of the year before death, individual income- and wealth-based monthly insurance premiums (low or high) and region (seven cities).

<sup>b</sup>In the full model, we additionally controlled for district-level current smoking rate (%), monthly average income (KRW), the proportion of the population with a high-school diploma (%) and population-standardized elderly mortality rate per 100 000 people.

$\text{PM}_{2.5}$ -associated mortality in South Korea, including the seven cities and nine provinces, was 17 948, assuming that  $\text{PM}_{2.5}$  levels remain constant until 2045. However, with gradual reductions in  $\text{PM}_{2.5}$  concentrations to 15, 10 and 5  $\mu\text{g}/\text{m}^3$  by 2045, the attributable all-cause mortality would decrease to 10 900, 7293 and 3647, respectively, by 2045 (Figure 2 and Supplementary Table S6, available as Supplementary data at *IJE* online).

## Discussion

The present study revealed long-term adverse effects of mid-range  $\text{PM}_{2.5}$  concentrations on elderly mortality in South Korea (mean levels ranged between 21.1 and 31.9  $\mu\text{g}/\text{m}^3$  with a median level of 27.4  $\mu\text{g}/\text{m}^3$  in the seven metropolitan cities). To fill the knowledge gap of the health effects of mid-range  $\text{PM}_{2.5}$  concentrations, we estimated linear HRs for the all-cause and cause-specific

**Table 4.** Cause-specific deaths attributable to long-term exposure to PM<sub>2.5</sub> in 2015 (95% confidence intervals in parenthesis)

|                            | Nation                     | Cities <sup>a</sup>     | Provinces <sup>b</sup>   |
|----------------------------|----------------------------|-------------------------|--------------------------|
| All-cause deaths           | 11 832.9 (4331.1, 19099.4) | 4693.5 (1717.9, 7575.7) | 7139.4 (2613.2, 11523.7) |
| All cardiovascular disease | 10 057.2 (6860.9, 13169.5) | 4025.4 (2746.1, 5271.0) | 6031.8 (4114.9, 7898.4)  |
| Ischaemic heart disease    | 6820.3 (5496.8, 8060.5)    | 2758.7 (2223.3, 3260.3) | 4061.7 (3273.5, 4800.2)  |
| Stroke                     | 788.3 (−1374.0, 2877.2)    | 316.7 (−551.9, 1155.8)  | 471.6 (−822.0, 1721.4)   |
| Haemorrhagic stroke        | −592.7 (−1824.2, 536.2)    | −254.7 (−784.1, 230.5)  | −337.9 (−1040.1, 305.8)  |
| Ischaemic stroke           | 0.0 (−1459.8, 1374.1)      | 0.0 (−645.8, 607.9)     | 0.0 (−814.0, 766.2)      |
| All respiratory disease    | −1682.9 (−4554.1, 1101.6)  | −625.3 (−1692.1, 409.3) | −1057.6 (−2861.9, 692.3) |
| COPD                       | 1190.7 (10.6, 2261.0)      | 392.9 (3.5, 746.0)      | 797.8 (7.1, 1514.9)      |
| Asthma                     | 640.8 (126.0, 1077.1)      | 191.8 (37.7, 322.5)     | 448.9 (88.3, 754.7)      |
| All cancer                 | 3518.0 (−59.9, 7037.0)     | 1451.0 (−24.7, 2902.4)  | 2067.0 (−35.2, 4134.6)   |
| Lung cancer                | 2143.4 (408.7, 3800.8)     | 851.6 (162.4, 1510.1)   | 1291.8 (246.3, 2290.7)   |

<sup>a</sup>Cities (7) included Seoul, Busan, Daegu, Incheon, Gwangju, Daejeon and Ulsan.  
<sup>b</sup>Provinces (9) included Kyunggi, Kwangwon, Choongbuk, Choongnam, Jeonbuk, Jeonnam, Kyungbuk, Kyungnam and Jeju.

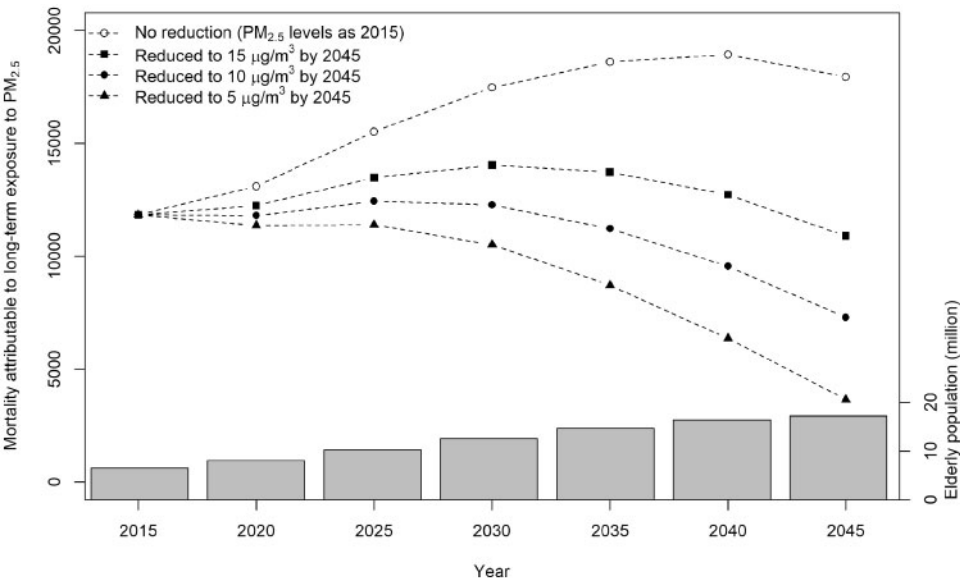

**Figure 2.** Projected mortality attributable to long-term exposure to PM<sub>2.5</sub> in South Korea (2015–45). Different curves show different projections based on varying reductions in PM<sub>2.5</sub> concentration; elderly population numbers are represented by grey bars

mortality, as conducted in previous cohort studies,<sup>2,3,15–22</sup> despite the non-linear relationship of the long-term exposure to PM<sub>2.5</sub> and some cause-specific mortalities. The present study showed a lower level of HR for the all-cause mortality among the elderly (1.024, 95% CI: 1.009, 1.039) compared with previous studies (ranged between 1.020<sup>18</sup> and 1.231<sup>20</sup>).<sup>2,3,15–22</sup> As shown in the [Supplementary Table S7](#), available as [Supplementary data](#) at *IJE* online, regions with lower levels of PM<sub>2.5</sub> concentrations in the USA are more likely to have higher HRs compared with regions with higher levels. For example, HRs for elderly mortality associated with a 10 µg/m<sup>3</sup> increase in PM<sub>2.5</sub> were 1.065, 1.231, 1.132, 1.188, 1.073, 1.068 and 1.020 in the regions with median or mean PM<sub>2.5</sub> levels of 8.2, 10.7, 10.7, 11.3, 11.5, 14.0 and 15.0 µg/m<sup>3</sup>, respectively<sup>16–20,22</sup> ([Supplementary Table S7](#),

available as [Supplementary data](#) at *IJE* online). The pooled results of previous cohort studies revealed that the risk of all- or natural-cause mortality among the elderly associated with an increase in PM<sub>2.5</sub> was lowered in regions with higher levels of PM<sub>2.5</sub>. The present study, with mid-range PM<sub>2.5</sub> concentrations, contributed to the less steep slope of the pooled results below a PM<sub>2.5</sub> of 35 µg/m<sup>3</sup> ([Supplementary Figure S7](#), available as [Supplementary data](#) at *IJE* online). Given that the IER functions are based on data with low or high levels of PM<sub>2.5</sub><sup>1</sup>, the results of the present study may contribute to reducing the uncertainties in the estimation of the long-term health effects of wide PM<sub>2.5</sub> concentrations.

The CVD-related mortality due to PM<sub>2.5</sub> in our study was also lower. The HRs for CVD mortality among the elderly in the USA and Hong Kong were estimated to range

between 1.105 and 1.221 per  $10 \mu\text{g}/\text{m}^3$  increase in  $\text{PM}_{2.5}$  levels, respectively,<sup>2,3,18</sup> whereas the present study observed an HR for CVD mortality of 1.09 per  $10 \mu\text{g}/\text{m}^3$  increase in  $\text{PM}_{2.5}$  levels.

Although the evidence for an overall higher respiratory mortality among the elderly associated with  $\text{PM}_{2.5}$  was not convincing in the present study,<sup>18</sup> strong linear associations between long-term exposure to  $\text{PM}_{2.5}$  and mortality due to asthma and COPD were observed. In particular, given the small number of deaths related to asthma [ $n=3168$  (0.8% of all-cause mortality)], the HR for asthma mortality was surprisingly high (1.23 per  $10 \mu\text{g}/\text{m}^3$ ). Whereas short-term exposure to  $\text{PM}_{2.5}$  was thought to increase the risk of mortality or hospitalization due to asthma,<sup>23–25</sup> increasing evidence suggests that long-term exposure to  $\text{PM}_{2.5}$  is also linked to incident asthma,<sup>26–29</sup> but sparsely to asthma mortality.<sup>30</sup> In the present study, the investigation of a susceptible population (the elderly) in areas with moderately high levels of  $\text{PM}_{2.5}$  enabled us to detect a strong relationship between long-term exposure to  $\text{PM}_{2.5}$  and asthma mortality. Although we observed consistently strong associations between 12-, 24- and 36-month exposure to  $\text{PM}_{2.5}$  and asthma mortality in fully adjusted models, more substantial effect sizes were observed in the 36-month moving average of  $\text{PM}_{2.5}$  exposure on COPD and lung cancer compared with shorter window periods (12- or 24-months). Because COPD and lung cancer are both chronic diseases with slow disease progression, relatively acute exposure to  $\text{PM}_{2.5}$  (12- or 24-months) may not show strong associations.

Whereas short-term exposure to  $\text{PM}_{2.5}$  showed associations with stroke mortality in South Korea,<sup>31</sup> we did not observe an association between the long-term effects of  $\text{PM}_{2.5}$  and stroke mortality in the elderly. Since we were unable to control for personal level risk factors (e.g. alcohol consumption and individual smoking habits), further studies are needed to elucidate the risk of stroke mortality associated with long-term  $\text{PM}_{2.5}$  exposure.

The use of different CR functions, exposure modelling and mortality data may result in different attributable mortality estimations. The IER functions estimated ~15 900 attributable deaths in 2016 in South Korea.<sup>32,33</sup> Using the HR derived from a cohort study in the USA in conjunction with satellite and chemical transport modelling, attributable deaths were estimated higher (17 203 deaths)<sup>5</sup> than the estimate using the IER functions of the health risk and the Community Multiscale Air Quality (CMAQ) of exposure modeling (11 872 deaths)<sup>4</sup> (Supplementary Table S8, available as Supplementary data at *IJE* online). The present study estimated 11 833 all-cause elderly ( $\geq 65$  years old) deaths, including 10 943 deaths caused by COPD, IHD, stroke and lung cancer using the nation-specific HRs and

CMAQ of exposure modelling. Therefore, one should be cautious when comparing the results between the present and previous studies.

The present study has several merits. We incorporated data from 1 720 230 eligible elderly adults across seven cities (32% of the entire elderly population in 2008) in South Korea to estimate HRs. Compared with a previous study that used sampling data that covered 2% of the national health insurance claims in a city (Seoul),<sup>34</sup> the results of the present study constitute more reliable estimates of  $\text{PM}_{2.5}$  effects. Moreover, our results demonstrate the effects of long-term exposure to moderately high levels of  $\text{PM}_{2.5}$  on mortality, which helps to fill the current knowledge gap. Furthermore, we projected the burden of mortality attributable to long-term exposure to  $\text{PM}_{2.5}$  to future years (up to 2045) under various scenarios, considering an increasingly susceptible ageing population. We found compelling evidence that demonstrates the health benefits of continuing to reduce  $\text{PM}_{2.5}$  concentrations, which has significant future policy implications.

The present study also had several limitations. First, we estimated the burden of mortality attributable to the long-term exposure to  $\text{PM}_{2.5}$  in 16 regions (seven cities and nine provinces) based on HRs derived from city-level data. Cities and provinces may have different  $\text{PM}_{2.5}$  concentrations and compositions and different socio-economic conditions. Additionally, we estimated the burden of mortality due to the long-term exposure to  $\text{PM}_{2.5}$  in future years up to 2045 by assuming a linear mortality HR across all  $\text{PM}_{2.5}$  concentration ranges. However, several studies have suggested that HR is non-linear, occasionally showing higher effects in areas with lower  $\text{PM}_{2.5}$  levels.<sup>35</sup> Because we estimated future scenarios of  $\text{PM}_{2.5}$  reduction to lower levels (5, 10 or  $15 \mu\text{g}/\text{m}^3$ ), our calculation for 2020–45 could have been underestimated. Therefore, caution should be exercised in the interpretation of the derived burden of mortality in the nine provinces and future years. Furthermore, given that only 75% of mortality occurs in individuals aged  $\geq 65$  years in South Korea, results based purely on mortality of elderly adults under-represent the burden of mortality for all age groups in South Koreans. Moreover, the development of diseases leading to death differed by cause of death. Specific causes of cardiovascular (except stroke) and respiratory deaths responded to the 3-year moving average of  $\text{PM}_{2.5}$  levels, whereas stroke mortality did not show associations. Thus, further research with detailed disease pathogenesis in relation to  $\text{PM}_{2.5}$  exposure is needed.

Additionally, we were not able to obtain individual-level risk factors, including smoking (e.g. ever-smoking, age at which smoking began and the amount of smoking), which may confound the association. Instead, we



controlled for the district-level smoking rate in the model, as described in previous analyses of administrative cohorts in the USA and Canada.<sup>16,36,37</sup> Alternatively, we compared the association by sex because men showed a higher current smoking rate than women (Supplementary Table S4, available as Supplementary data at *IJE* online). However, we did not observe particularly higher HRs for the mortality of men compared with that of women across the cause-specific deaths (Supplementary Figure S6, available as Supplementary data at *IJE* online). Although a previous study suggested that ecological information on the smoking rate can be informative in estimating HRs,<sup>37</sup> further studies with individual-level characteristics are warranted to estimate a more representative number of attributable deaths due to chronic PM<sub>2.5</sub> exposure. Finally, we projected the burden of mortality with various scenarios of gradual PM<sub>2.5</sub> reductions by 2045. However, linear reductions in PM<sub>2.5</sub> levels may not be realistic enough to reflect future reductions. Furthermore, when we projected the burden of mortality attributable to PM<sub>2.5</sub>, we did not consider changes in PM<sub>2.5</sub> emission sources and composition over time, which may have influenced the HRs.

## Conclusion

This study revealed the health effects of long-term exposure to moderately high PM<sub>2.5</sub> levels on all-cause and cause-specific mortality in the elderly population of South Korea. Furthermore, the projection of mortality attributable to long-term exposure to PM<sub>2.5</sub> explicitly indicated the urgent need for emission controls and reductions in PM<sub>2.5</sub> concentration levels in South Korea over the coming decades to safeguard the vulnerable ageing population.

## Supplementary data

Supplementary data are available at *IJE* online.

## Funding

This research was supported by the National Strategic Project-Fine Particle of the National Research Foundation of Korea, funded by the Ministry of Science, Information, Communications, and Technology, the Ministry of Environment, and the Ministry of Health and Welfare [grant numbers. 2017M3D8A1092008, 2017M3D8A1092009], as well as the Center for Environmental Health through the Ministry of Environment.

## Acknowledgements

This study used customized health insurance data based on the health insurance claim-related data in Korea. The aim and conclusion of this study are irrelevant to the National Health Insurance

Service, Republic of Korea. The research number of this study is NHIS-2019-1-023.

## Conflict of interest

None declared.

## References

1. Cohen AJ, Brauer M, Burnett R *et al.* Estimates and 25-year trends of the global burden of disease attributable to ambient air pollution: an analysis of data from the Global Burden of Diseases Study 2015. *Lancet* 2017;**389**:1907–18.
2. Wong CM, Lai HK, Tsang H *et al.* Satellite-based estimates of long-term exposure to fine particles and association with mortality in elderly Hong Kong residents. *Environ Health Perspect* 2015;**123**:1167–72.
3. Yang Y, Tang R, Qiu H *et al.* Long term exposure to air pollution and mortality in an elderly cohort in Hong Kong. *Environ Int* 2018;**117**:99–106.
4. Han C, Kim S, Lim YH, Bae HJ, Hong YC. Spatial and temporal trends of number of deaths attributable to ambient PM<sub>2.5</sub> in the Korea. *J Korean Med Sci* 2018;**33**:e193.
5. Kim JH, Oh IH, Park JH, Cheong HK. Premature deaths attributable to long-term exposure to ambient fine particulate matter in the Republic of Korea. *J Korean Med Sci* 2018;**33**:e251.
6. Brook RD, Rajagopalan S, Pope CA III *et al.* Particulate matter air pollution and cardiovascular disease: an update to the scientific statement from the American Heart Association. *Circulation* 2010;**121**:2331–378.
7. Bind MA, Peters A, Koutrakis P, Coull B, Vokonas P, Schwartz J. Quantile regression analysis of the distributional effects of air pollution on blood pressure, heart rate variability, blood lipids, and biomarkers of inflammation in elderly American men: The normative aging study. *Environ Health Perspect* 2016;**124**:1189–198.
8. Dubowsky SD, Suh H, Schwartz J, Coull BA, Gold DR. Diabetes, obesity, and hypertension may enhance associations between air pollution and markers of systemic inflammation. *Environ Health Perspect* 2006;**114**:992–98.
9. Kim HC, Cho MC. Korea hypertension fact sheet 2018. *Clin Hypertens* 2018;**24**:13.
10. Bateson TF, Schwartz J. Who is sensitive to the effects of particulate air pollution on mortality? A case-crossover analysis of effect modifiers. *Epidemiology* 2004;**15**:143–9.
11. KOSIS. Population census. 2017. <http://kosis.kr/eng/> (3 June 2019, date last accessed).
12. Seong SC, Kim YY, Khang YH *et al.* Data resource profile: The National Health Information Database of the National Health Insurance Service in South Korea. *Int J Epidemiol* 2017;**46**:799–800.
13. Han C, Lim YH, Yorifuji T, Hong YC. Air quality management policy and reduced mortality rates in Seoul Metropolitan Area: A quasi-experimental study. *Environ Int* 2018;**121**:600–09.
14. Kim BU, Bae C, Kim HC, Kim E, Kim S. Spatially and chemically resolved source apportionment analysis: Case study of high particulate matter event. *Atmos Environ* 2017;**162**:55–70.

15. Beelen R, Raaschou-Nielsen O, Stafoggia M *et al.* Effects of long-term exposure to air pollution on natural-cause mortality: An analysis of 22 European cohorts within the multicentre ESCAPE project. *Lancet* 2014;**383**:785–95.
16. Di Q, Wang Y, Zanobetti A *et al.* Air pollution and mortality in the Medicare population. *N Engl J Med* 2017;**376**:2513–522.
17. Shi L, Zanobetti A, Kloog I *et al.* Low-concentration PM<sub>2.5</sub> and mortality: estimating acute and chronic effects in a population-based study. *Environ Health Perspect* 2016;**124**:46–52.
18. Thurston GD, Burnett RT, Turner MC *et al.* Ischemic heart disease mortality and long-term exposure to source-related components of US fine particle air pollution. *Environ Health Perspect* 2016;**124**:785–94.
19. Wang Y, Kloog I, Coull BA, Kosheleva A, Zanobetti A, Schwartz JD. Estimating causal effects of long-term PM<sub>2.5</sub> exposure on mortality in New Jersey. *Environ Health Perspect* 2016;**124**:1182–188.
20. Wang Y, Shi L, Lee M *et al.* Long-term exposure to PM<sub>2.5</sub> and mortality among older adults in the southeastern US. *Epidemiology* 2017;**28**:207–14.
21. Wong CM, Tsang H, Lai HK *et al.* Cancer mortality risks from long-term exposure to ambient fine particle. *Cancer Epidemiol Biomarkers Prev* 2016;**25**:839–45.
22. Zeger SL, Dominici F, McDermott A, Samet JM. Mortality in the Medicare population and chronic exposure to fine particulate air pollution in urban centers (2000–2005). *Environ Health Perspect* 2008;**116**:1614–619.
23. Delamater PL, Finley AO, Banerjee S. An analysis of asthma hospitalizations, air pollution, and weather conditions in Los Angeles County, California. *Sci Total Environ* 2012;**425**:110–18.
24. Liu Y, Pan J, Zhang H *et al.* Short-term exposure to ambient air pollution and asthma mortality. *Am J Respir Crit Care Med* 2019;**200**:24–32.
25. Ko FW, Tam W, Wong TW *et al.* Effects of air pollution on asthma hospitalization rates in different age groups in Hong Kong. *Clin Exp Allergy* 2007;**37**:1312–319.
26. Salimi F, Morgan G, Rolfe M *et al.* Long-term exposure to low concentrations of air pollutants and hospitalisation for respiratory diseases: a prospective cohort study in Australia. *Environ Int* 2018;**121**:415–20.
27. Weichenthal S, Bai L, Hatzopoulou M *et al.* Long-term exposure to ambient ultrafine particles and respiratory disease incidence in Toronto, Canada: a cohort study. *Environ Health* 2017;**16**:64.
28. Jacquemin B, Siroux V, Sanchez M *et al.* Ambient air pollution and adult asthma incidence in six European cohorts (ESCAPE). *Environ Health Perspect* 2015;**123**:613–21.
29. Guarnieri M, Balme JR. Outdoor air pollution and asthma. *Lancet (London, England)* 2014;**383**:1581–592.
30. Kravchenko J, Akushevich I, Abernethy AP, Holman S, Ross WG Jr, Lysterly HK. Long-term dynamics of death rates of emphysema, asthma, and pneumonia and improving air quality. *Int J Chron Obstruct Pulmon Dis* 2014;**9**:613–27.
31. Hong YC, Lee JT, Kim H, Ha EH, Schwartz J, Christiani DC. Effects of air pollutants on acute stroke mortality. *Environ Health Perspect* 2002;**110**:187–91.
32. World Health Organization. *Burden of disease from ambient air pollution for 2016*. [https://www.who.int/airpollution/data/AAP\\_BoD\\_results\\_May2018\\_final.pdf](https://www.who.int/airpollution/data/AAP_BoD_results_May2018_final.pdf) (25 October 2019, date last accessed).
33. Health Effects Institute. *State of Global Air 2019. Special Report*; 2019. [https://www.stateofglobalair.org/sites/default/files/soga\\_2019\\_report.pdf](https://www.stateofglobalair.org/sites/default/files/soga_2019_report.pdf) (4 November 2019, date last accessed).
34. Kim H, Kim J, Kim S *et al.* Cardiovascular effects of long-term exposure to air pollution: A population-based study with 900 845 person-years of follow-up. *J Am Heart Assoc* 2017;**6**:e007170.
35. Burnett RT, Pope CA, Ezzati M *et al.* An integrated risk function for estimating the global burden of disease attributable to ambient fine particulate matter exposure. *Environ Health Perspect* 2014;**122**:397–403.
36. Pinault L, Tjepkema M, Crouse DL *et al.* Risk estimates of mortality attributed to low concentrations of ambient fine particulate matter in the Canadian community health survey cohort. *Environ Health* 2016;**15**:18.
37. Pope CA, III, Lefler JS, Ezzati M *et al.* Mortality risk and fine particulate air pollution in a large, representative cohort of US adults. *Environ Health Perspect* 2019;**127**:077007.
